# Supplementary material
Source: publisher figshare collection journal article supplement (https://sage.figshare.com/ndownloader/files/14375435)
Supplement: Supplementary file 1 [file 14375435]

In order to thoroughly explore the potential effects of musical training and testing site on our data, we have performed a median split on the musicianship variables and calculated our planned comparisons (assessing the effect of cadence for each style separately) for each test site (Exp 1) and musicianship group (Exps 1 and 2). These analyses indicate that the shape of the Cadence x Style interaction does not change across the levels of these covariates.

For all t-tests in table below, critical Bonferroni  $p = .025$ , significant differences are bolded, and positive effect sizes indicate that V-I received a higher rating than bVII-I. It is clear from these results that the quality of the cadence x style interaction is not affected by Test Site or Musicianship, neither in Experiment 1 nor 2.

| Subgroup                           | Effect of Cadence                           |                                              |
|------------------------------------|---------------------------------------------|----------------------------------------------|
|                                    | Classical                                   | Rock                                         |
| Exp 1 Site 1                       | $t(36) = -9.45$<br>$p < .001$<br>$d = 1.21$ | $t(36) = -0.41$<br>$p = 0.68$<br>$d = -0.49$ |
| Exp 1 Site 2                       | $t(39) = -8.30$<br>$p < .001$<br>$d = 1.18$ | $t(39) = -0.30$<br>$p = 0.77$<br>$d = -0.25$ |
| Exp 1 Musical Training High        | $t(19) = -5.87$<br>$p < .001$<br>$d = 1.32$ | $t(19) = -0.46$<br>$p = 0.65$<br>$d = 0.10$  |
| Exp 1 Musical Training Low         | $t(19) = -6.26$<br>$p < .001$<br>$d = 1.41$ | $t(19) = 0.08$<br>$p = 0.94$<br>$d = -0.02$  |
| Exp 1 Musical Training Onset Early | $t(20) = -5.90$<br>$p < .001$<br>$d = 1.29$ | $t(20) = 0.56$<br>$p = 0.58$<br>$d = -0.12$  |
| Exp 1 Musical Training Onset Late  | $t(18) = -7.01$<br>$p < .001$<br>$d = 1.61$ | $t(18) = -0.93$<br>$p = 0.37$<br>$d = 0.21$  |
| Exp 2 Musical Training High        | $t(17) = -5.69$<br>$p < .001$<br>$d = 1.34$ | $t(17) = -2.14$<br>$p = 0.05$<br>$d = 0.50$  |
| Exp 2 Musical Training Low         | $t(22) = -6.47$<br>$p < .001$<br>$d = 1.35$ | $t(22) = -1.98$<br>$p = 0.06$<br>$d = 0.41$  |

|                                    |                                             |                                             |
|------------------------------------|---------------------------------------------|---------------------------------------------|
| Exp 2 Musical Training Onset Early | $t(20) = -5.54$<br>$p < .001$<br>$d = 1.21$ | $t(20) = -2.25$<br>$p = 0.04$<br>$d = 0.49$ |
| Exp 2 Musical Training Onset Late  | $t(19) = -6.61$<br>$p < .001$<br>$d = 1.48$ | $t(19) = -1.80$<br>$p = 0.09$<br>$d = 0.40$ |
